# Supplementary material for: ROS-generating TiO2 nanoparticles for non-invasive sonodynamic therapy of cancer
Source: PubMed Central journal article supplement (PMC4800401; doi:10.1038/srep23200), 2016-03-21
Supplement: srep23200-s1.pdf [file srep23200-s1.pdf]

(Manuscript for *Scientific Reports*)

## **ROS-generating TiO<sub>2</sub> nanoparticles for non-invasive sonodynamic therapy of cancer**

Dong Gil You<sup>1,2,\*</sup>, V.G. Deepagan<sup>3,\*</sup>, Wooram Um<sup>2,4</sup>, Sangmin Jeon<sup>1,2</sup>, Sejin Son<sup>2</sup>, Hyeyoun Chang<sup>2,5</sup>, Hwa In Yoon<sup>2,6</sup>, Yong Woo Cho<sup>6</sup>, Maggie Swierczewska<sup>7</sup>, Seulki Lee<sup>7</sup>, Martin G. Pomper<sup>7</sup>, Ick Chan Kwon<sup>2</sup>, Kwangmeyung Kim<sup>2,5</sup> & Jae Hyung Park<sup>1,3,4</sup>

<sup>1</sup>School of Chemical Engineering, Sungkyunkwan University, Suwon 440-746, Republic of Korea.

<sup>2</sup>Center for Theragnosis, Korea Institute of Science and Technology, 39-1 Hawolgok-dong, Seongbuk-gu, Seoul 136-791, Republic of Korea.

<sup>3</sup>Department of Polymer Science and Engineering, Sungkyunkwan University, Suwon 440-746, Republic of Korea.

<sup>4</sup>Samsung Advance Institute for Health Sciences and Technology, Sungkyunkwan University, Suwon 440-746, Republic of Korea.

<sup>5</sup>Korea University of Science and Technology, 113 Gwahangno, Yuseong-gu, Daejeon 305-333, Republic of Korea.

<sup>6</sup>Department of Chemical Engineering, Hanyang University, Ansan 426-791, Republic of Korea.

<sup>7</sup>The Russell H. Morgan Department of Radiology and Radiological Science, Johns Hopkins School, Baltimore, Maryland 21287-0006, United States.

\* These authors contributed equally to this paper.

Corresponding authors:

Jae Hyung Park, Ph.D.

Tel: +82-31-290-7288; fax: +82-31-299-6857; e-mail: [jhpark1@skku.edu](mailto:jhpark1@skku.edu)

Kwangmeyung Kim, Ph.D.

Tel: +82-2-958-5916; fax: +82-2-958-5909; e-mail: [kim@kist.re.kr](mailto:kim@kist.re.kr)

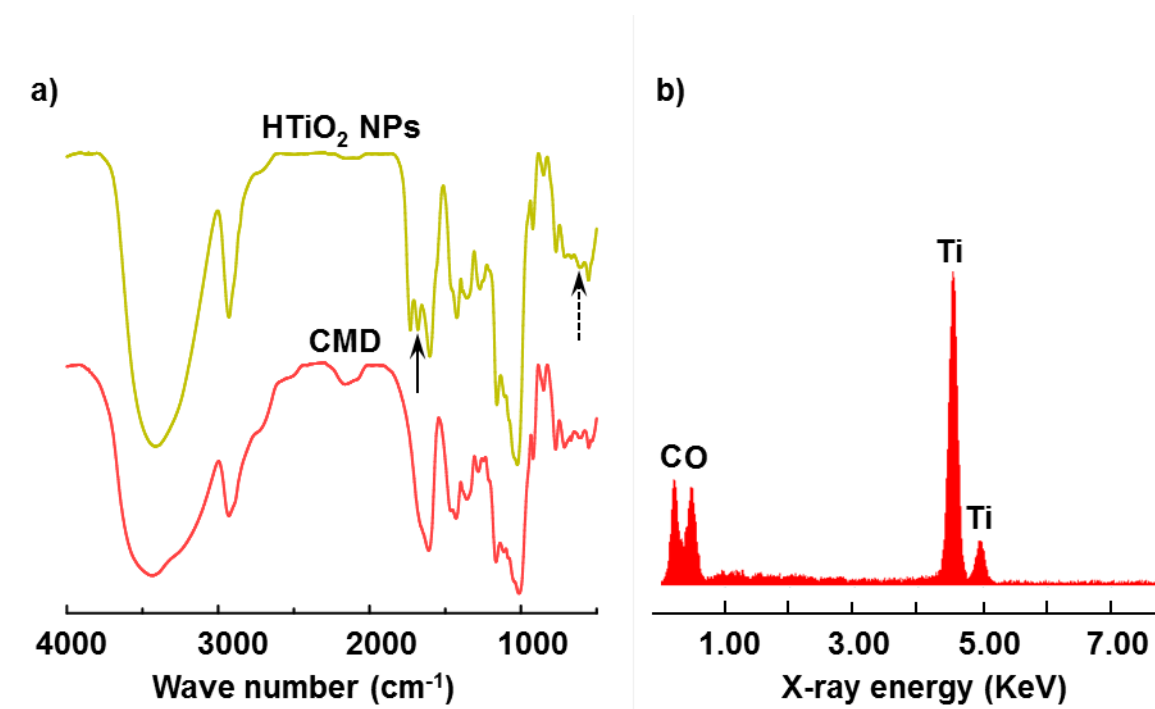

**Figure S1.** (a) FT-IR spectra of HTiO<sub>2</sub> NPs and CMD. The peak at 600 cm<sup>-1</sup>, indicated by a dashed arrow, is attributed to C-C bending vibration of dopamine. The peak at 1686 cm<sup>-1</sup>, indicated by a solid arrow, is assigned to the carbonyl stretching vibration of the amide bond between CMD and dopamine. (b) EDS spectrum of HTiO<sub>2</sub> NPs.

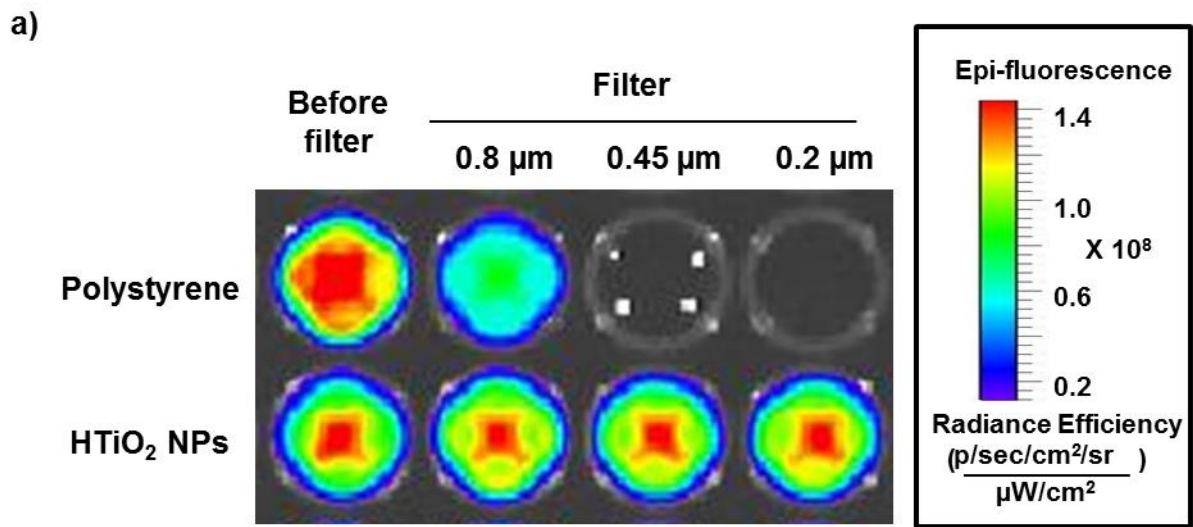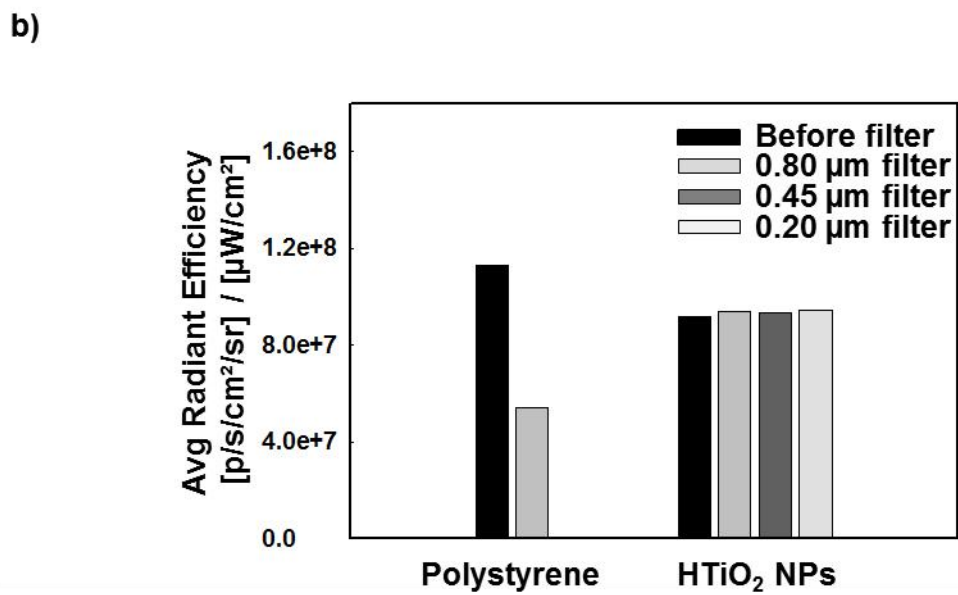

**Figure S2.** Flexibility of HTiO<sub>2</sub> NPs. (a) Fluorescence image of HTiO<sub>2</sub> NPs after passing through a series of syringe filters. (b) Quantification of fluorescence signal intensity.

a)

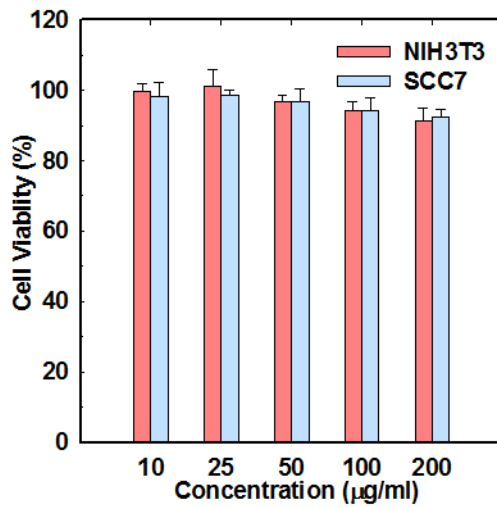

b)

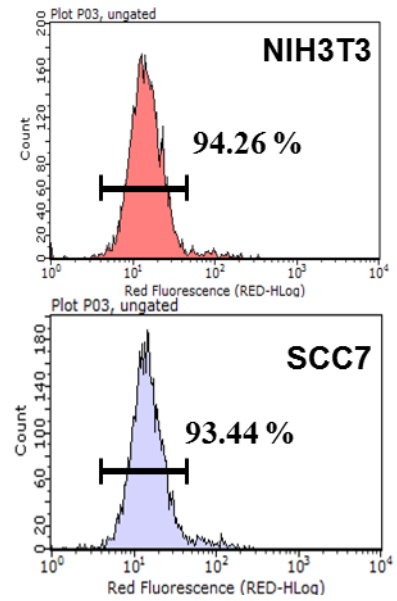

**Figure S3.** Toxicity of HTiO<sub>2</sub> NPs. (a) *In vitro* cytotoxicity of HTiO<sub>2</sub> NPs, measured by the MTT assay and (b) FACS analysis.

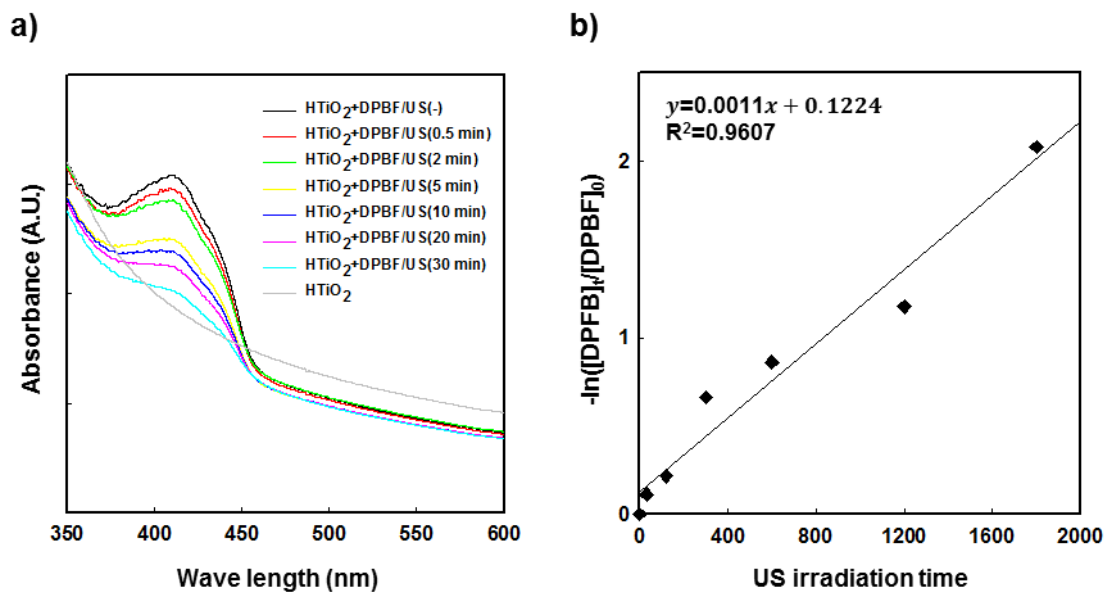

**Figure S4.** The singlet oxygen generation ability of HTiO<sub>2</sub> NPs with ultrasound. (a) UV-Vis spectra of DPBF with increasing exposure time. (b) First-order plot of DPBF absorbance versus time.

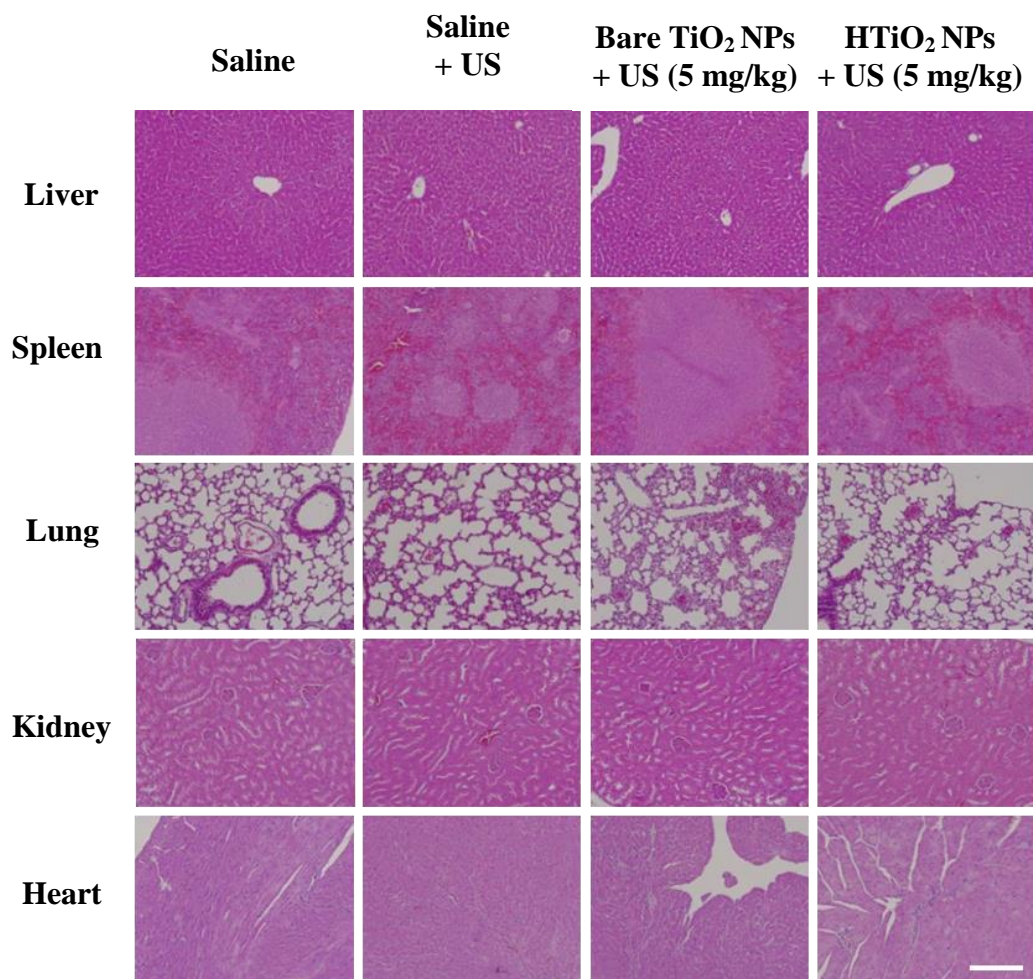

**Figure S5.** H&E staining of major organs after SDT. (Scale bar, 200  $\mu$ m).

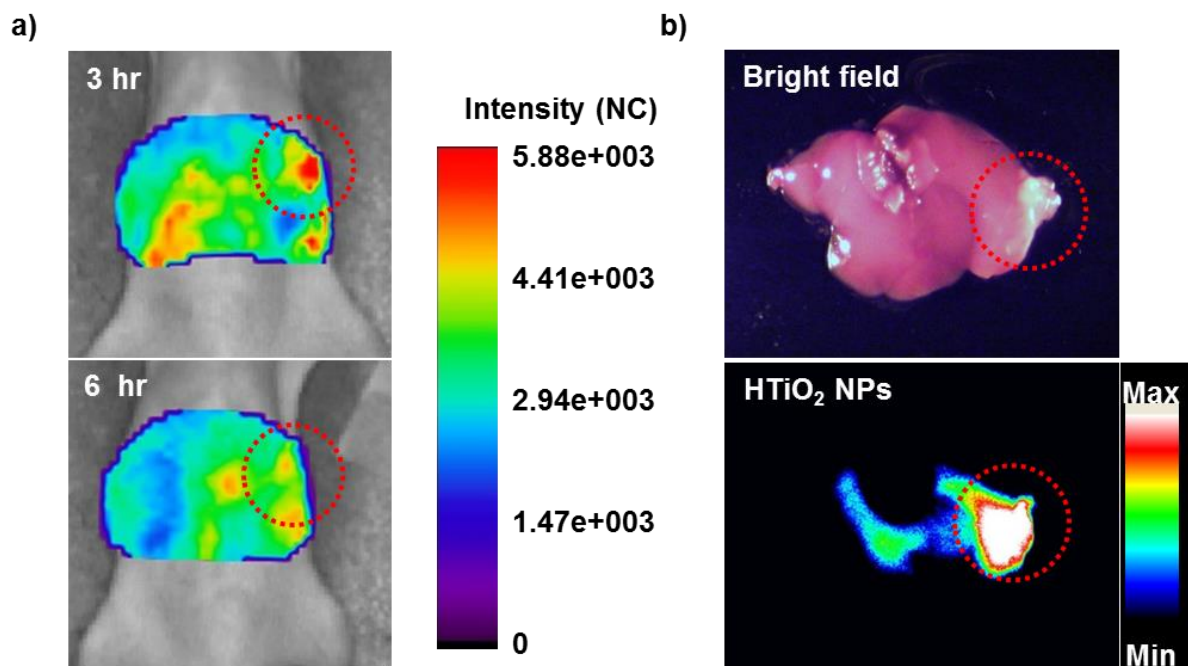

**Figure S6.** *In vivo* biodistribution of HTiO<sub>2</sub> NPs in the liver tumor model. (a) Time-dependent accumulation of nanoparticles in mice bearing liver tumor after intravenous injection of HTiO<sub>2</sub> NPs. (b) *Ex vivo* bright-field and fluorescence images of liver tumor 6 h post injection. The dotted circle indicating the tumor region.
